# Supplementary material for: Grafted iron(iii) ions significantly enhance NO2 oxidation rate and selectivity of TiO2 for photocatalytic NOx abatement
Source: PubMed Central journal article supplement — RSC Adv. 2018 Aug 3;8(49):27674–85. doi: 10.1039/c8ra05017a (PMC9084282; doi:10.1039/c8ra05017a), 2018-08-03
Supplement: RA-008-C8RA05017A-s001.pdf [file RA-008-C8RA05017A-s001.pdf]

# Grafted Iron(III) Ions Significantly Enhance NO<sub>2</sub> Oxidation Rate and Selectivity of TiO<sub>2</sub> for Photocatalytic NO<sub>x</sub> Abatement

Julia Patzsch,<sup>†</sup> Jacob N. Spencer,<sup>‡</sup> Andrea Folli,<sup>‡</sup> and Jonathan Z. Bloh<sup>\*,†</sup>

<sup>†</sup>*DECHEMA-Forschungsinstitut, Theodor-Heuss-Allee 25, 60486 Frankfurt am Main,  
Germany*

<sup>‡</sup>*School of Chemistry, Cardiff University, Main Building, Park Place, Cardiff CF10 3AT,  
Wales, United Kingdom*

E-mail: bloh@dechema.de

## 1 Supporting Information

### 2 1.1 EPR spectroscopy: *g*-Tensor identification

3 The resonances at  $g = 9.678$ , 6, 4.286 and the broad background signal are indicative of  
4 high spin Fe(III),  ${}^6S_{5/2}$  ground term (5 unpaired electrons), described by the total spin  
5 Hamiltonian in Equation 1, sum of electron Zeeman and zero field interactions.

$$\hat{H}(Fe(III)) = \hat{H}_{EZI} + \hat{H}_{ZFI} = \mu_B \mathbf{B}^T \mathbf{g} \mathbf{S} + D \left[ \hat{S}_z^2 - \frac{1}{3} S(S+1) \right] + E(\hat{S}_x^2 - \hat{S}_y^2) \quad (1)$$

6 In Equation 1,  $\mu_B$  is the Bohr magneton,  $\mathbf{B}$  the applied magnetic field,  $\mathbf{g}$  the *g*-matrix of  
7 the unpaired electrons,  $\mathbf{S}$  the total spin vector ( $S_x, S_y, S_z$  are components of spin along three

8 mutually perpendicular crystalline axes x, y, and z) and  $D$  and  $E$  are the zero field splitting  
9 parameters, which are induced by distortions of the crystal field in the compound. At least  
10 three different ferric crystallographic environments are responsible for the Fe(III) resonances  
11 in Fig. 3. The almost isotropic resonance at  $g = 4.286$  is often found in strong ( $D > h\nu$ )  
12 low symmetry ( $E/D \approx 1/3$ ) crystal field.<sup>1,2</sup> This resonance arises from the transition within  
13 the middle Kramers doublet of the six energy levels ( $2S + 1 = 6$  where  $S = 5/2$ ) that at  
14 zero field are grouped in three states doubly degenerate (*i.e.*  $m_s = \pm 5/2; \pm 3/2; \pm 1/2$ ).<sup>1</sup>  
15 The upper and lower pairs have strongly anisotropic  $g$  values. The three principal values  
16 of the diagonalized  $\mathbf{g}$  matrix are 9.678, 0.857, 0.607.<sup>1</sup> Only the first value is visible in the  
17 spectrum as the other two are above the upper limit of the magnetic field scanned in the  
18 present experiment. The resonance at  $g = 6$  corresponds to another ferric crystallographic  
19 environment with low symmetry ( $E/D = 0$ ).<sup>1,2</sup> Solution of the spin Hamiltonian for this  
20 crystallographic environment provide a  $g$  equal to 6 when the magnetic field is perpendicular  
21 to  $S_z$  and a  $g$  equal to 2 when the magnetic field is parallel to  $S_z$ .<sup>1</sup> This resonance at  
22  $g = 2$  is not readily visible as it is covered by the other signals present at free spin region.  
23 However, in a powder one gets all the orientations in the external magnetic field, hence  
24 resonances extending from the lowest field,  $g = 6$ , to the highest field,  $g = 2$ , with the  
25 perpendicular component being statistically more probable than the parallel one. Finally,  
26 the broad background signal is produced by crystallographic environments where  $D$  and  
27  $E$  are both significant and the ratio  $E/D$  is in between the limit cases of  $E/D = 0$  and  
28  $E/D \approx 1/3$ . There is no evidence in the spectrum of signals associated with low spin  
29 Fe(III),  $^2S_{1/2}$  ground term (1 unpaired electron). This species would exhibit an axial  $\mathbf{g}$   
30 tensor with principal values around 2.23 and 1.93, that are not found in the spectrum in  
31 Fig. 3.<sup>2</sup>

## 32 1.2 Kinetic analysis of the NO<sub>x</sub> oxidation performance

33 The data were either analyzed using Langmuir-Hinshelwood kinetics or, when the reaction  
34 rate was found to be linear with the inlet concentration, with first-order kinetics. In both  
35 cases, the reaction rates were calculated from the kinetic expressions using the conversion  
36 equations for a plug flow type reactor.

$$k^1 = -\frac{\ln(c/c_0)}{\tau} \quad (2)$$

37 This yields eqn. 2 for the case of first-order kinetics which was fit to the measured data  
38 points using linear regression. For Langmuir-Hinshelwood kinetics, no explicit equation could  
39 be obtained. Therefore, the rate law, eqn. 3, was numerically integrated over the reactor  
40 volume using Euler-Cauchy algorithm with a step-width of  $0.001V$ . The resulting value was  
41 then fit to the measured data points using non-linear optimization (Levenberg-Marquardt  
42 algorithm). Subsequently, first-order rate constants were calculated from eqn. 4.

$$\frac{dc}{dt} = -\frac{k \cdot K \cdot c}{K \cdot c + 1} \quad (3)$$

$$k^1 = k \cdot K \quad (4)$$

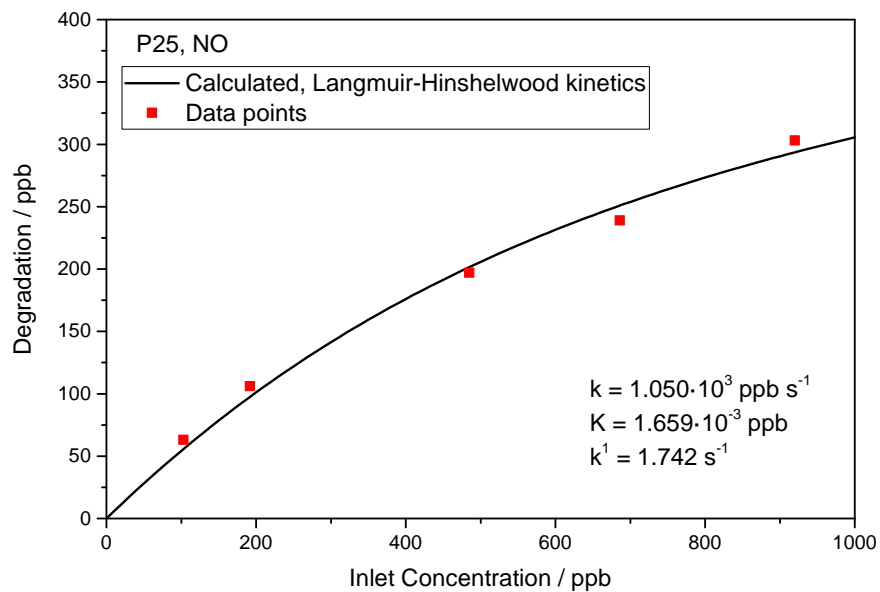

**Figure S1:** The conversion of NO over illuminated P25 as a function of inlet concentration analyzed using Langmuir-Hinshelwood kinetics.

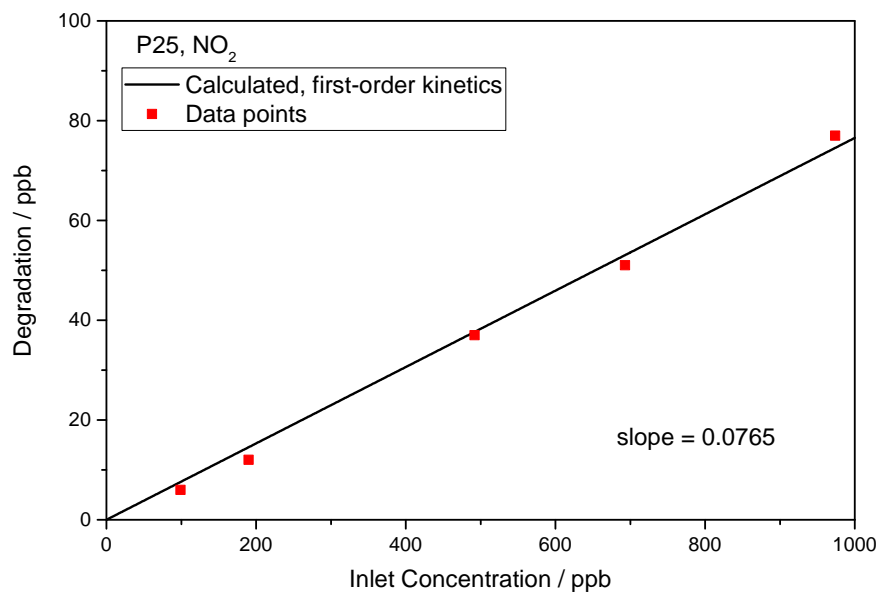

**Figure S2:** The conversion of NO<sub>2</sub> over illuminated P25 as a function of inlet concentration analyzed using first-order kinetics.

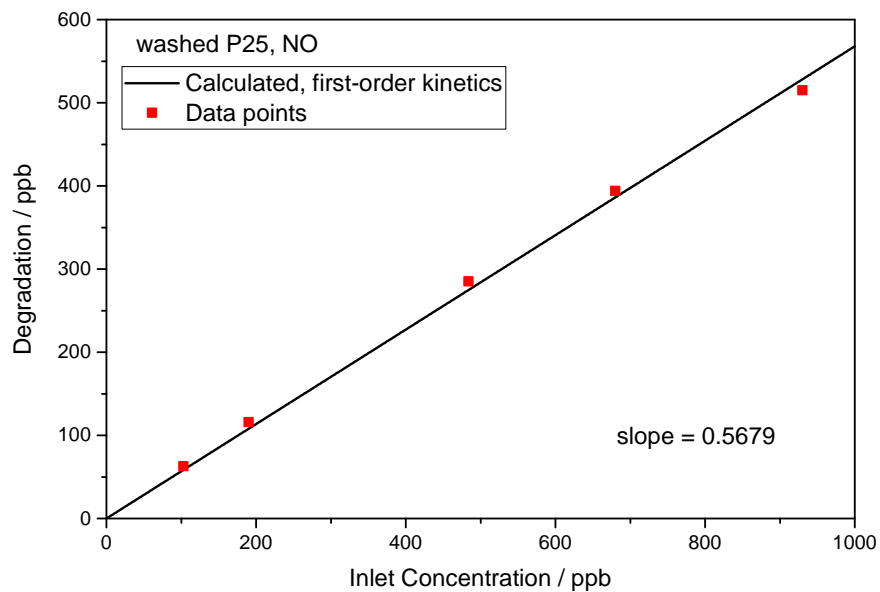

**Figure S3:** The conversion of NO over illuminated washed P25 as a function of inlet concentration analyzed using first-order kinetics.

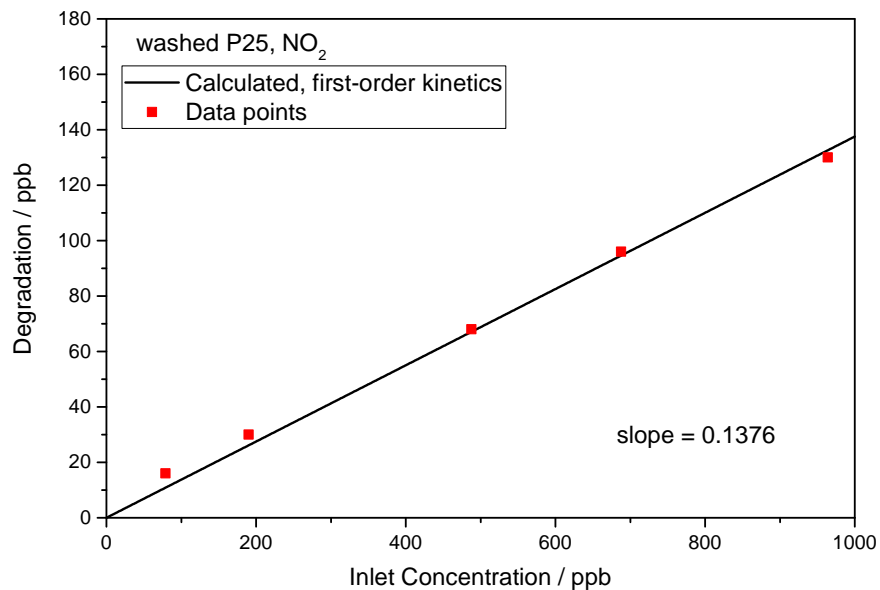

**Figure S4:** The conversion of NO<sub>2</sub> over illuminated washed P25 as a function of inlet concentration analyzed using first-order kinetics.

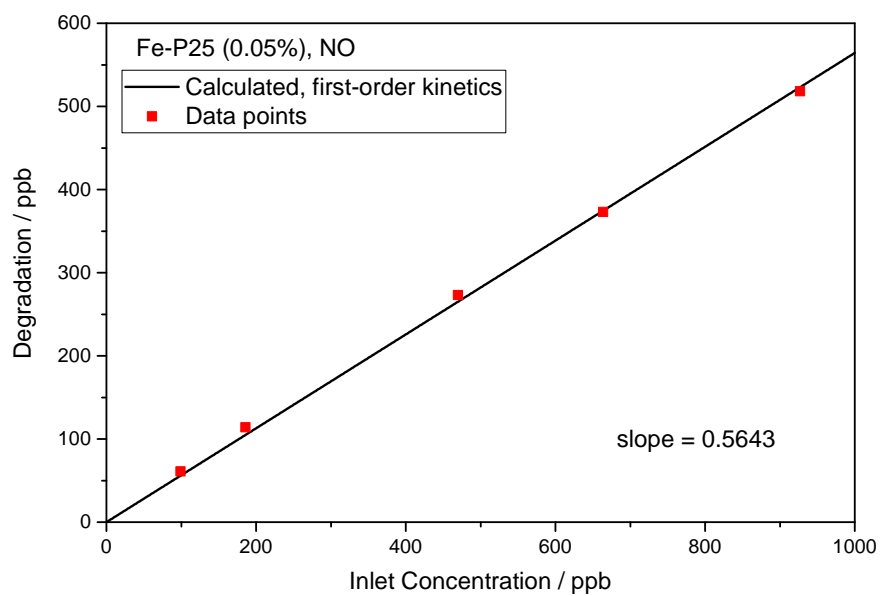

**Figure S5:** The conversion of NO over illuminated iron-grafted P25 (0.05 at.% Fe) as a function of inlet concentration analyzed using first-order kinetics.

### 43 1.3 XPS analysis

44 A sample grafted with 0.01at.% Fe was subjected to XPS analysis. As seen in Fig. S6, traces  
45 of iron might be present (0.1 at.%) but the signals are very low and near the detection limit  
46 so any kind of quantitative interpretation is extremely difficult.

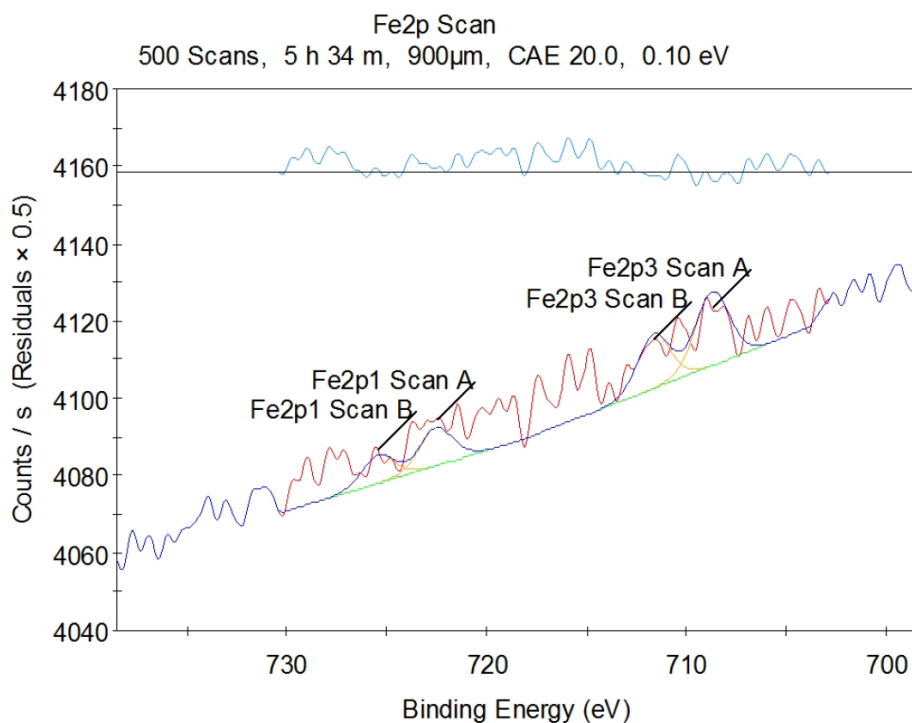

**Figure S6:** XPS analysis of a sample grafted with 0.01at.% Fe, shown is the binding energy region specific for Fe2p.

47 1.4 NO<sub>x</sub> oxidation performance of Mn- oder Cu-grafted P25

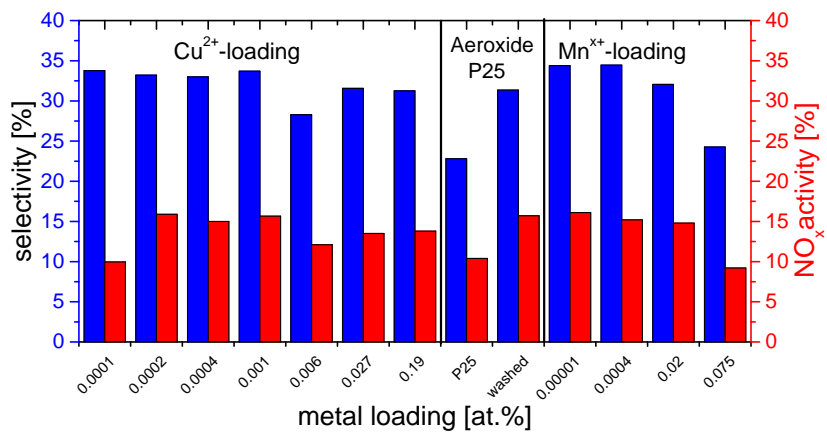

**Figure S7:** The DeNO<sub>x</sub>-performance of P25 samples grafted with different amounts of Cu(II) and Mn(II) ions. Displayed are the nitrate selectivity (blue) as well as the NO<sub>x</sub> removal rates (red).



48 **1.5 NO<sub>x</sub> oxidation performance of other commercially available**  
 49 **TiO<sub>2</sub> materials grafted with Fe(II) ions**

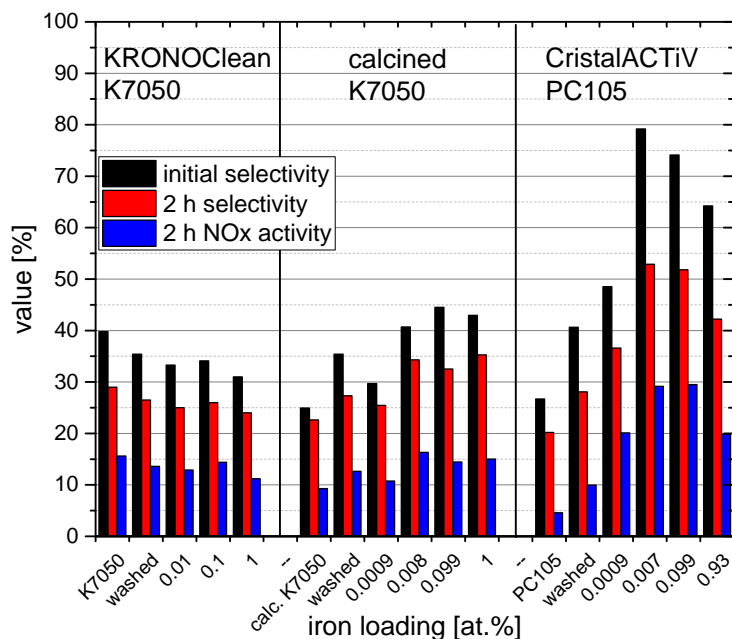

**Figure S8:** The DeNO<sub>x</sub>-performance of other TiO<sub>2</sub> materials grafted with different amounts of iron. Displayed are the initial nitrate selectivity (black) as well as the selectivity (red) and NO<sub>x</sub> removal rates (blue) after 2 h on stream. The KRONOClean K7050 material is shown before and after calcination at 400 °C for 4 h in air prior to the grafting procedure.

50 **References**

- 51 (1) Castner Jr., T.; Newell, G.; Holton, W.; Slichter, C. Note on the paramagnetic resonance  
 52 of iron in glass. *J. Chem. Phys.* **1960**, *32*, 668–673.
- 53 (2) Domracheva, N.; Pyataev, A.; Manapov, R.; Gruzdev, M.; Chervonova, U.; Kolker, A.  
 54 Structural, magnetic and dynamic characterization of liquid crystalline iron(III) Schiff  
 55 base complexes with asymmetric ligands. *Eur. J. Inorg. Chem.* **2011**, 1219–1229.
